# Supplementary material
Source: HighWire-hosted journal article supplement (https://jnm.snmjournals.org/highwire/filestream/95541/field_highwire_adjunct_files/0/225250_Supplemental_Data.pdf)
Supplement: 225250_Supplemental_Data.pdf [file 225250_Supplemental_Data.pdf]

1. Supplemental Table 1: Dosimetry of [<sup>18</sup>F]PSMA-11 using OLINDA/EXM

| 10 <sup>-3</sup> mGy/MBq | NGP1-1 | NGP1-2 | NGP1-3 | NGP1-4 | NGP1-5 | NGP1-6 | Mean  | SD    |
|--------------------------|--------|--------|--------|--------|--------|--------|-------|-------|
| Adrenals                 | 8,32   | 12,7   | 9,9    | 9,82   | 9,88   | 10,1   | 10,1  | 1,4   |
| Brain                    | 1,86   | 2,13   | 1,81   | 1,82   | 1,86   | 1,89   | 1,9   | 0,1   |
| Breasts                  | 3,64   | 5,21   | 3,83   | 3,92   | 3,73   | 3,92   | 4,0   | 0,6   |
| gallbladder wall         | 8,95   | 13,2   | 10,4   | 9,64   | 9,32   | 10,2   | 10,3  | 1,5   |
| LLI wall                 | 39,4   | 49,5   | 35,4   | 34,5   | 31     | 42,1   | 38,7  | 6,6   |
| small intestine          | 8,09   | 11,4   | 8,25   | 8,37   | 7,98   | 9,03   | 8,9   | 1,3   |
| stomach wall             | 6,29   | 9,25   | 7,05   | 6,82   | 6,9    | 7,13   | 7,2   | 1,0   |
| ULI wall                 | 28,4   | 36,3   | 26,2   | 25,5   | 23,1   | 30,6   | 28,4  | 4,7   |
| heart wall               | 5,55   | 7,94   | 6,02   | 5,97   | 5,7    | 6,02   | 6,2   | 0,9   |
| kidneys                  | 80,7   | 149    | 108    | 123    | 131    | 127    | 119,8 | 23,3  |
| liver                    | 17,6   | 26     | 24,6   | 17,7   | 16,6   | 19,6   | 20,4  | 4,0   |
| lungs                    | 13,6   | 17,3   | 13,7   | 14     | 12,1   | 13,4   | 14,0  | 1,7   |
| muscle                   | 4,59   | 6,61   | 4,86   | 5,03   | 4,85   | 5,1    | 5,2   | 0,7   |
| pancreas                 | 18,6   | 13,3   | 11,6   | 10,4   | 10,9   | 11,4   | 12,7  | 3,1   |
| red marrow               | 5,23   | 7,23   | 5,54   | 5,88   | 5,65   | 5,89   | 5,9   | 0,7   |
| osteogenic cells         | 11,5   | 9,07   | 8,15   | 13,9   | 12,8   | 8,74   | 10,7  | 2,4   |
| skin                     | 3,27   | 4,71   | 3,43   | 3,59   | 3,45   | 3,6    | 3,7   | 0,5   |
| spleen                   | 15,2   | 35,2   | 41,9   | 19     | 36,4   | 25,7   | 28,9  | 10,6  |
| testes                   | 6,48   | 5,47   | 3,84   | 4,1    | 8,13   | 4,12   | 5,4   | 1,7   |
| thymus                   | 4,36   | 6,23   | 4,52   | 4,71   | 4,46   | 4,68   | 4,8   | 0,7   |
| thyroid                  | 3,89   | 5,52   | 3,96   | 4,24   | 1,03   | 4,18   | 3,8   | 1,5   |
| urinary bladder wall     | 5,2    | 7,38   | 5,2    | 5,46   | 5,19   | 5,62   | 5,7   | 0,9   |
| uterus                   | 5,97   | 8,48   | 6,02   | 6,28   | 5,97   | 6,53   | 6,5   | 1,0   |
| total body               | 5,77   | 8,22   | 6,36   | 6,42   | 6,22   | 6,55   | 6,6   | 0,8   |
| effective dose (mSv/MBq) | 0,0132 | 0,0185 | 0,0124 | 0,0139 | 0,0114 | 0,0151 | 0,014 | 0,003 |

2. Supplemental Table 2: Comparison of absorbed doses of various organs for the most common used PSMA PET tracers. The color scale shows the reported doses per organ from the lowest dose (dark blue) to the highest dose (dark red).

| Organs (mGy/MBq)         | [ <sup>18</sup> F]DCFBC | [ <sup>18</sup> F]DCFPyL | [ <sup>68</sup> Ga]PSMA 617 | [ <sup>18</sup> F]PSMA 1007 | [ <sup>68</sup> Ga]PSMA 11  | [ <sup>18</sup> F]PSMA-11 |
|--------------------------|-------------------------|--------------------------|-----------------------------|-----------------------------|-----------------------------|---------------------------|
|                          | Cho et al., 2012        | Szabo et al., 2015       | Afshar-Oromieh et al., 2015 | Giesel et al., 2017         | Afshar-Oromieh et al., 2017 | Piron et al.              |
| Adrenals                 | 1,85E-02                | 3,11E-02                 | 1,48E-02                    | 1,94E-02                    | 1,42E-02                    | 1,88E-02                  |
| Brain                    | 4,21E-03                | 2,19E-03                 | 3,53E-02                    | 7,20E-03                    | 9,00E-03                    | 1,60E-03                  |
| Gallbladder wall         | 1,79E-02                | 1,44E-02                 | 1,50E-02                    | 2,22E-02                    | 1,44E-02                    | 1,14E-02                  |
| LLI wall <sup>1</sup>    | 2,47E-02                | 1,05E-02                 | 1,33E-02                    | 4,83E-02                    | 1,23E-02                    | 4,83E-03                  |
| Small intestine          | 2,36E-02                | 9,13E-03                 | 1,83E-02                    | 1,56E-02                    | 1,63E-02                    | 1,19E-02                  |
| Stomach wall             | 3,02E-02                | 1,16E-02                 | 1,30E-02                    | 1,42E-02                    | 1,20E-02                    | 5,73E-03                  |
| ULI wall <sup>2</sup>    | 2,34E-02                | 1,67E-02                 | 4,48E-02                    | 4,08E-02                    | 5,40E-02                    | 6,60E-03                  |
| Heart wall               | 2,92E-02                | 1,29E-02                 | 1,20E-02                    | 2,51E-02                    | 1,09E-02                    | 4,69E-03                  |
| Kidneys                  | 2,84E-02                | 9,45E-02                 | 2,06E-01                    | 1,70E-01                    | 2,62E-01                    | 8,50E-02                  |
| Liver                    | 2,46E-02                | 3,80E-02                 | 2,88E-02                    | 6,02E-02                    | 3,09E-02                    | 1,71E-02                  |
| Lungs                    | 2,45E-02                | 1,08E-02                 | 1,15E-02                    | 1,11E-02                    | 1,02E-02                    | 9,86E-03                  |
| Muscle                   | 9,69E-03                | 6,32E-03                 | 1,15E-02                    | 1,00E-02                    | 1,05E-02                    | 4,19E-03                  |
| Pancreas                 | 1,92E-02                | 2,44E-02                 | 1,45E-02                    | 1,92E-02                    | 1,38E-02                    | 1,08E-02                  |
| Red marrow               | 1,70E-02                | 1,04E-02                 | 1,00E-02                    | 1,33E-02                    | 9,20E-03                    | 7,96E-03                  |
| Skin                     | 7,30E-03                | 4,05E-03                 | 9,50E-03                    | 7,30E-03                    | 8,85E-02                    | 2,30E-03                  |
| Spleen                   | 1,72E-02                | 1,85E-02                 | 2,85E-02                    | 7,39E-02                    | 4,46E-02                    | 2,27E-02                  |
| Testes                   | 1,54E-02                | 1,01E-02                 | 1,15E-02                    | 8,37E-03                    | 1,04E-02                    | 4,21E-03                  |
| Thymus                   | 1,10E-02                | 5,56E-03                 | 1,15E-02                    | 9,90E-03                    | 9,90E-03                    | 3,08E-03                  |
| Thyroid                  | 1,17E-02                | 8,56E-02                 | 1,13E-02                    | 8,50E-03                    | 9,70E-03                    | 2,40E-03                  |
| Urinary bladder wall     | 3,24E-02                | 8,64E-02                 | 9,03E-02                    | 1,87E-02                    | 1,30E-01                    | 1,26E-02                  |
| Effective dose (mSv/MBq) | 1,99E-02                | 1,39E-02                 | 2,08E-02                    | 2,20E-02                    | 2,36E-02                    | 1,28E-02                  |

<sup>1</sup> lower large intestinal wall, <sup>2</sup> upper large intestinal wall
